# Supplementary material for: High levels of antibiotics released by a pharmaceutical manufacturer negatively impacted wastewater treatment plant performance
Source: Royal Society of Chemistry journal article supplement (doi:10.1039/d4ew01032a), 2025-01-01
Supplement: d4ew01032a1.pdf [file d4ew01032a1.pdf]

## Supporting Information

### **High levels of antibiotics released by a pharmaceutical manufacturer negatively impacted wastewater treatment plant performance**

Chantal A. Keane<sup>a,b,\*</sup>, Jinglong Li<sup>a</sup>, Jiaying Li<sup>a,c</sup>, Jochen F. Mueller<sup>a</sup>, Jake W. O'Brien<sup>a</sup>, Rory Verhagen<sup>a</sup>

<sup>a</sup>Queensland Alliance for Environmental Health Sciences (QAEHS), The University of Queensland, Woolloongabba, QLD, 4102, Australia

<sup>b</sup>Urban Utilities, Fortitude Valley, QLD, 4006, Australia

<sup>c</sup>School of Civil Engineering, The University of Sydney, NSW, 2008, Australia

\*Corresponding author: Chantal Keane, Email: [chantal.keane@uq.edu.au](mailto:chantal.keane@uq.edu.au). Mailing Address: Queensland Alliance for Environmental Health Sciences (QAEHS), The University of Queensland, 20 Cornwall Street, Woolloongabba, QLD, 4102, Australia.

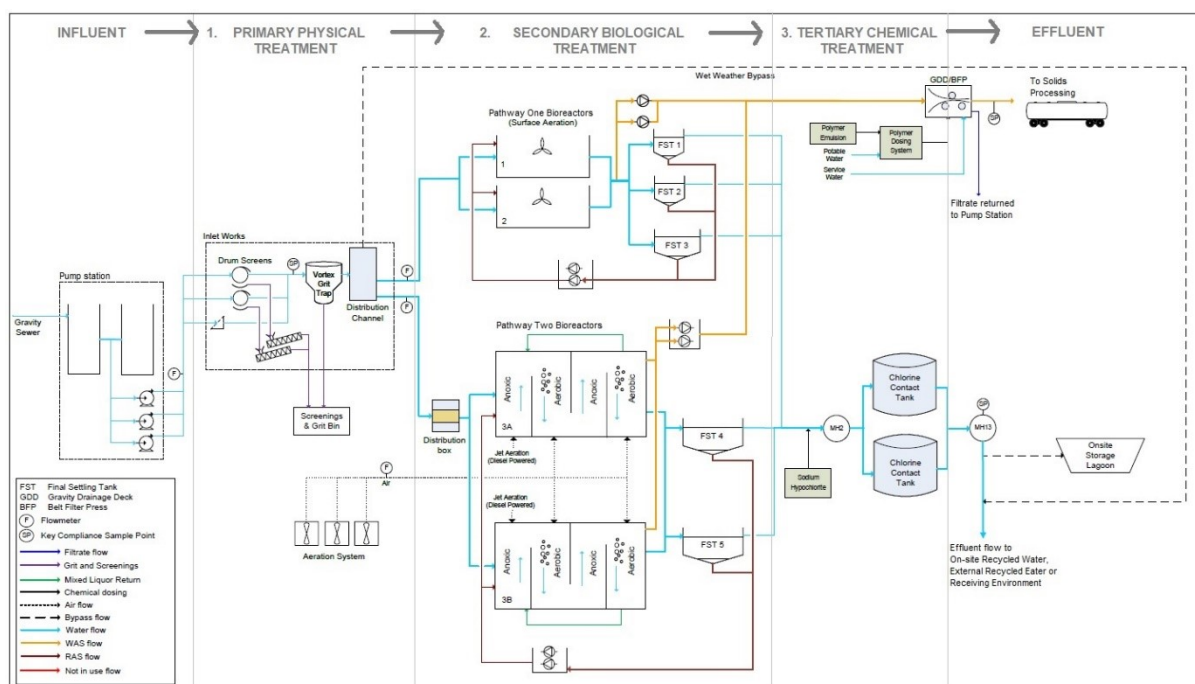

**Figure S1:** WWTP process flow diagram. The influent flows in through primary physical treatment, secondary biological treatment and tertiary chemical treatment before being discharged as effluent.

## Materials and Methods SI - Chemical standard preparation and analytical method

Stock solutions of all analytes and IS were prepared to 1000 mg/L in methanol (MeOH, HPLC-grade, Merck, Darmstadt, Germany) or dimethyl sulfoxide (DMSO, Merck, Darmstadt, Germany) and stored at  $-20^{\circ}\text{C}$ . Amoxicillin, penicillin V, meropenem, gentamicin, neomycin, and colistin were prepared from standard powders 48 h before experimentation, due to stability considerations of solutions. Formic acid (FA) was procured from VWR Chemicals (Tingalpa, QLD, Australia), while hydrochloric acid (HCl) was procured from Merck (Kilsyth, VIC, Australia). Ultra-pure water of  $18.2\text{ M}\Omega\text{ cm}^{-1}$  purity was obtained from a Milli-Q system (Merck Millipore, Bedford, MA, USA). Regenerated cellulose syringe filters ( $0.2\text{ }\mu\text{m}$  RC filters) were procured from Agilent (Mulgrave, VIC, Australia).

An ultra-high performance liquid chromatography system (Nexera series-LC 40, Shimadzu, Kyoto, Japan) coupled to a tandem mass spectrometer (SCIEX Triple Quad 7500 System, AB SCIEX, Framingham, MA, USA) was used for sample analysis. Two transitions were used for each analyte with the optimised collision energy (CE) and collision exit cell potential (CXP) for each transition. Entrance potential was set to  $+10\text{ V}$  for all positive mode transitions and  $-10\text{ V}$  for all negative mode transitions. The ion source temperature was set at  $550^{\circ}\text{C}$  (accommodating an LC flow rate of  $0.4\text{ mL min}^{-1}$ ) and electrospray ionisation voltages (ISV) were optimised for each analyte, while the ion source gases 1 and 2 were set at 60 psi and curtain gas at 40 psi. Q0 dissociation (Q0D) was optimised for each transition. The mass spectrometer was run in scheduled multiple reaction monitoring (sMRM) mode and in switching positive and negative ion modes. Dwell times were used as default values of the SCIEX OS 2.1.6 software (AB SCIEX, Framingham, MA, USA). Instrument details and parameters of each transition are shown in Li et al. (2023)<sup>25</sup>.

A Hypersil Gold C18 selectivity column ( $100 \times 2.1\text{ mm}$ ,  $1.9\text{ }\mu\text{m}$ ,  $175\text{ }\text{\AA}$ , Thermo Fisher Scientific, Waltham, MA, USA) with a Gemini NX-C18 guard column ( $4 \times 2\text{ mm}$ , Phenomenex, Torrance, CA, USA) was used to achieve chromatographic separation. A Kinetex EVO C18 column ( $30 \times 2.1\text{ mm}$ ,  $5\text{ }\mu\text{m}$ ,  $100\text{ }\text{\AA}$ , Phenomenex, Torrance, CA, USA) was used as a pre-injection column. Mobile phases consisted of 95:5 (v/v) Milli-Q water: methanol with 0.2% formic acid (mobile phase A) and 95:5 (v/v) methanol: Milli-Q water with 0.2% formic acid (mobile phase B). The flow rate was set at  $0.4\text{ mL min}^{-1}$ .

Mobile phase B was initially set at 5%, followed by a linear increase to 40% over 4 min, a linear increase to 100% over 3 min, held for 3 min, finally returned to 5% over 0.1 min, and kept steady for 2 min to equilibrate the system. The total run time was 12 min. Data were acquired and processed using SCIEX OS 2.1.6.

**Table S1** Chemical information, ordered by class groupings.

|    | Name              | Abbr. | Class A       | Class B | Class C   | CAS No.    | Salt form                   | M.I.<br>mass | Formula        | Supplier |
|----|-------------------|-------|---------------|---------|-----------|------------|-----------------------------|--------------|----------------|----------|
| 1  | Amoxicillin       | AMX   | Penicillin    | parent  | Human/Vet | 26787-78-0 | Trihydrate                  | 365.10       | C16H19N3O5S    | HPC      |
| 2  | Amoxicilloic acid | AMXa  | Penicillin    | TP      |           | 42947-63-7 | Sodium salt                 | 383.12       | C16H21N3O6S    | TRC      |
| 3  | Ampicillin        | AMP   | Penicillin    | parent  | Human/Vet | 69-53-4    | Trihydrate                  | 349.11       | C16H19N3O4S    | HPC      |
| 4  | Cloxacillin       | CLX   | Penicillin    | parent  | Vet       | 61-72-3    | Sodium salt                 | 435.07       | C19H18ClN3O5S  | TRC      |
| 5  | Dicloxacillin     | DLX   | Penicillin    | parent  | Human     | 3116-76-5  | Sodium Monohydrate          | 469.03       | C19H17Cl2N3O5S | LGC      |
| 6  | Flucloxacillin    | FLX   | Penicillin    | parent  | Human     | 5250-39-5  | Sodium salt                 | 453.06       | C19H17ClFN3O5S | TRC      |
| 7  | Penicillin V      | PenV  | Penicillin    | parent  | Human     | 87-08-1    |                             | 350.09       | C16H18N2O5S    | TRC      |
| 8  | Penicillin V acid | PenVa | Penicillin    | TP      |           | 1049-84-9  | Hydrate                     | 368.10       | C16H20N2O6S    | Biosynth |
| 9  | Piperacillin      | PIP   | Penicillin    | parent  | Human     | 61477-96-1 | Sodium salt                 | 517.16       | C23H27N5O7S    | HPC      |
| 10 | Cefaclor          | CFC   | Cephalosporin | parent  | Human     | 53994-73-3 | Hydrate                     | 367.04       | C15H14ClN3O4S  | TRC      |
| 11 | Cefalexin         | CFX   | Cephalosporin | parent  | Human/Vet | 15686-71-2 | Hydrate                     | 347.09       | C16H17N3O4S    | TRC      |
| 12 | Cephalothin       | CFL   | Cephalosporin | parent  | Human     | 153-61-7   |                             | 396.05       | C16H16N2O6S2   | TRC      |
| 13 | Cefazolin         | CFZ   | Cephalosporin | parent  | Human     | 25953-19-9 |                             | 454.03       | C14H14N8O4S3   | TRC      |
| 14 | Cefepime          | CFP   | Cephalosporin | parent  | Human     | 88040-23-7 | Dihydrochloride monohydrate | 480.12       | C19H24N6O5S2   | HPC      |
| 15 | Ceftiofur         | CTF   | Cephalosporin | parent  | Vet       | 80370-57-6 |                             | 523.03       | C19H17N5O7S3   | TRC      |

|    | Name                         | Abbr.                   | Class A       | Class B   | Class C                    | CAS No.     | Salt form                         | M.I.<br>mass | Formula          | Supplier |
|----|------------------------------|-------------------------|---------------|-----------|----------------------------|-------------|-----------------------------------|--------------|------------------|----------|
| 16 | Ceftriaxone                  | CTR                     | Cephalosporin | parent    | Human                      | 73384-59-5  | Disodium salt<br>hemiheptahydrate | 554.05       | C18H18N8O7S<br>3 | HPC      |
| 17 | Cefuroxime                   | CRX                     | Cephalosporin | parent    | Human/V<br>et              | 55268-75-2  | Sodium salt                       | 424.07       | C16H16N4O8S      | LGC      |
| 18 | Ciprofloxacin                | CIP                     | Quinolone     | parent/TP | Human                      | 85721-33-1  | Hydrochloride<br>hydrate          | 331.13       | C17H18FN3O3      | HPC      |
| 19 | Desethylene<br>ciprofloxacin | deCIP                   | Quinolone     | TP        |                            | 103222-12-4 | Hydrochloride                     | 305.12       | C15H16FN3O3      | TRC      |
| 20 | Enrofloxacin                 | ENR                     | Quinolone     | parent    | Vet                        | 93106-60-6  |                                   | 359.16       | C19H22FN3O3      | HPC      |
| 21 | Moxifloxacin                 | MOX                     | Quinolone     | parent    | Human                      | 151096-09-2 |                                   | 401.18       | C21H24FN3O4      | TRC      |
| 22 | Moxifloxacin sulfate         | MOX-<br>SO <sub>4</sub> | Quinolone     | TP        |                            | 234080-64-9 | Disodium salt                     | 481.13       | C21H24FN3O7<br>S | TRC      |
| 23 | Norfloxacin                  | NOR                     | Quinolone     | parent    | Human                      | 70458-96-7  |                                   | 319.13       | C16H18FN3O3      | TRC      |
| 24 | Desethylene<br>norfloxacin   | deNOR                   | Quinolone     | TP        |                            | 75001-77-3  | Hydrochloride                     | 293.12       | C14H16FN3O3      | TRC      |
| 25 | Ofloxacin                    | OFL                     | Quinolone     | parent    | Human                      | 82419-36-1  |                                   | 361.14       | C18H20FN3O4      | LGC      |
| 26 | Desmethyl ofloxacin          | dmOFL                   | Quinolone     | TP        |                            | 82419-52-1  |                                   | 347.13       | C17H18FN3O4      | TRC      |
| 27 | Sarafloxacin                 | SAR                     | Quinolone     | parent    | Vet <sup>a</sup>           | 98105-99-8  |                                   | 385.12       | C20H17F2N3O<br>3 | TRC      |
| 28 | Oxolinic acid                | OXO                     | Quinolone     | parent    | Vet <sup>a</sup>           | 14698-29-4  |                                   | 261.06       | C13H11NO5        | TRC      |
| 29 | Sulfachlorpyridazine         | SCP                     | Sulfonamide   | parent    | Human/V<br>et <sup>a</sup> | 80-32-0     |                                   | 284.01       | C10H9ClN4O2<br>S | HPC      |
| 30 | Sulfadiazine                 | SDZ                     | Sulfonamide   | parent    | Human/V<br>et              | 68-35-9     |                                   | 250.05       | C10H10N4O2S      | HPC      |
| 31 | Acetyl sulfadiazine          | aSDZ                    | Sulfonamide   | TP        |                            | 127-74-2    |                                   | 292.06       | C12H12N4O3S      | TRC      |
| 32 | Sulfadimethoxine             | SDM                     | Sulfonamide   | parent    | Human/V<br>et <sup>a</sup> | 122-11-2    |                                   | 310.07       | C12H14N4O4S      | HPC      |
| 33 | Sulfamerazine                | SMR                     | Sulfonamide   | parent    | Vet                        | 127-79-7    |                                   | 264.07       | C11H12N4O2S      | HPC      |

|    | Name                              | Abbr.  | Class A     | Class B       | Class C                    | CAS No.     | Salt form | M.I.<br>mass | Formula          | Supplier |
|----|-----------------------------------|--------|-------------|---------------|----------------------------|-------------|-----------|--------------|------------------|----------|
| 34 | Acetyl sulfamerazine              | aSMR   | Sulfonamide | TP            |                            | 127-73-1    |           | 306.08       | C13H14N4O3S      | TRC      |
| 35 | Sulfamethazine                    | SMZ    | Sulfonamide | parent        | Vet                        | 57-68-1     |           | 278.08       | C12H14N4O2S      | HPC      |
| 36 | Acetyl<br>sulfamethazine          | aSMZ   | Sulfonamide | TP            |                            | 100-90-3    |           | 320.09       | C14H16N4O3S      | TRC      |
| 37 | Sulfamethizole                    | SMT    | Sulfonamide | parent        | Human/V<br>et <sup>a</sup> | 144-82-1    |           | 270.02       | C9H10N4O2S2      | HPC      |
| 38 | Sulfamethoxazole                  | SMX    | Sulfonamide | parent        | Human                      | 723-46-6    |           | 253.05       | C10H11N3O3S      | HPC      |
| 39 | Acetyl<br>sulfamethoxazole        | aSMX   | Sulfonamide | TP            |                            | 21312-10-7  |           | 295.06       | C12H13N3O4S      | TRC      |
| 40 | Sulfapyridine                     | SPY    | Sulfonamide | parent/T<br>P | Human/V<br>et <sup>a</sup> | 144-83-2    |           | 249.06       | C11H11N3O2S      | LGC      |
| 41 | Acetyl sulfapyridine              | aSPY   | Sulfonamide | TP            |                            | 19077-98-6  |           | 291.07       | C13H13N3O3S      | TRC      |
| 42 | Sulfasalazine                     | SLZ    | Sulfonamide | parent        | Human/V<br>et              | 599-79-1    |           | 398.07       | C18H14N4O5S      | USP      |
| 43 | Sulfathiazole                     | STZ    | Sulfonamide | parent        | Vet                        | 72-14-0     |           | 255.01       | C9H9N3O2S2       | HPC      |
| 44 | Acetyl sulfathiazole              | aSTZ   | Sulfonamide | TP            |                            | 127-76-4    |           | 297.02       | C11H11N3O3S<br>2 | TRC      |
| 45 | Azithromycin                      | AZI    | Macrolide   | parent        | Human                      | 83905-01-5  |           | 748.51       | C38H72N2O12      | TRC      |
| 46 | Desmethyl<br>azithromycin         | dmAZI  | Macrolide   | TP            |                            | 172617-84-4 |           | 734.49       | C37H70N2O12      | TRC      |
| 47 | Clarithromycin                    | CLA    | Macrolide   | parent        | Human                      | 81103-11-9  |           | 747.48       | C38H69NO13       | TRC      |
| 48 | Desmethyl<br>Clarithromycin       | dmCLA  | Macrolide   | TP            |                            | 101666-68-6 |           | 733.46       | C37H67NO13       | TRC      |
| 49 | Erythromycin-<br>H <sub>2</sub> O | ERY-18 | Macrolide   | TP            |                            | 23893-13-2  |           | 715.45       | C37H65NO12       | TRC      |
| 50 | Erythromycin                      | ERY    | Macrolide   | parent        | Human/V<br>et              | 114-07-8    |           | 733.46       | C37H67NO13       | TRC      |

|    | Name                        | Abbr.    | Class A      | Class B | Class C            | CAS No.     | Salt form     | M.I.<br>mass | Formula      | Supplier |
|----|-----------------------------|----------|--------------|---------|--------------------|-------------|---------------|--------------|--------------|----------|
| 51 | Desmethyl erythromycin      | dmERY    | Macrolide    | TP      |                    | 992-62-1    |               | 719.45       | C36H65NO13   | TRC      |
| 52 | Roxithromycin               | ROX      | Macrolide    | parent  | Human              | 80214-83-1  |               | 836.52       | C41H76N2O15  | TRC      |
| 53 | Descladinose roxithromycin  | dcROX    | Macrolide    | TP      |                    | 214902-82-6 |               | 678.43       | C33H62N2O12  | TRC      |
| 54 | Spiramycin I #              | SP-I     | Macrolide    | parent  | Human/Vet          | 24916-50-5  |               | 842.51       | C43H74N2O14  | TRC      |
| 55 | Spiramycin III #            | SP-III   | Macrolide    | parent  | Human/Vet          | 24916-52-7  |               | 898.54       | C46H78N2O15  | TRC      |
| 56 | Monoacetyl spiramycin II #  | maSP-II  | Macrolide    | parent  | Human/Vet          | 87111-42-0  |               | 926.54       | C47H78N2O16  | TRC      |
| 57 | Diacetyl spiramycin II #    | daSP-II  | Macrolide    | parent  | Human/Vet          | 110101-92-3 |               | 968.55       | C49H80N2O17  | TRC      |
| 58 | Monoacetyl spiramycin III # | maSP-III | Macrolide    | parent  | Human/Vet          | 112501-15-2 |               | 940.55       | C48H80N2O16  | TRC      |
| 59 | Diacetyl spiramycin III #   | daSP-III | Macrolide    | parent  | Human/Vet          | 99664-83-2  |               | 982.56       | C50H82N2O17  | TRC      |
| 60 | Spiramycin II #             | SP-II    | Macrolide    | parent  | Human/Vet          | 24916-51-6  |               | 884.52       | C45H76N2O15  | TRC      |
| 61 | Tilmicosin                  | TIL      | Macrolide    | parent  | Vet                | 108050-54-0 |               | 868.57       | C46H80N2O13  | TRC      |
| 62 | Tulathromycin               | TUL      | Macrolide    | parent  | Vet                | 217500-96-4 |               | 805.57       | C41H79N3O12  | TRC      |
| 63 | Tylosin                     | TYL      | Macrolide    | parent  | Vet                | 1401-69-0   |               | 915.52       | C46H77NO17   | HPC      |
| 64 | Virginiamycin M1            | VIR-M    | Macrolide    | parent  | Vet                | 21411-53-0  |               | 525.25       | C28H35N3O7   | TRC      |
| 65 | Virginiamycin S1            | VIR-S    | Macrolide    | parent  | Vet                | 23152-29-6  |               | 823.35       | C43H49N7O10  | TRC      |
| 66 | Chlortetracycline           | CTC      | Tetracycline | parent  | Vet                | 57-62-5     | Hydrochloride | 478.11       | C22H23ClN2O8 | TRC      |
| 67 | Demeclocycline              | DMC      | Tetracycline | parent  | Human <sup>a</sup> | 127-33-3    | Hydrochloride | 464.10       | C21H21ClN2O8 | LGC      |



|    | Name                               | Abbr. | Class A      | Class B | Class C       | CAS No.      | Salt form                    | M.I.<br>mass | Formula           | Supplier          |
|----|------------------------------------|-------|--------------|---------|---------------|--------------|------------------------------|--------------|-------------------|-------------------|
| 68 | Doxycycline                        | DOX   | Tetracycline | parent  | Human/V<br>et | 564-25-0     | Hyclate                      | 444.15       | C22H24N2O8        | TRC               |
| 69 | Minocycline                        | MIN   | Tetracycline | parent  | Human         | 10118-90-8   | Hydrochloride<br>dihydrate   | 457.18       | C23H27N3O7        | LGC               |
| 70 | Oxytetracycline                    | OTC   | Tetracycline | parent  | Vet           | 79-57-2      | Hydrochloride                | 460.15       | C22H24N2O9        | TRC               |
| 71 | Tetracycline                       | TET   | Tetracycline | parent  | Human/V<br>et | 60-54-8      |                              | 444.15       | C22H24N2O8        | TRC               |
| 72 | Fluconazole                        | FCZ   | Azole        | parent  | Human/V<br>et | 86386-73-4   |                              | 306.10       | C13H12F2N6O       | TRC               |
| 73 | Fluconazole N-oxide                | FNO   | Azole        | TP      |               | 1997296-62-4 |                              | 322.10       | C13H12F2N6O<br>2  | TRC               |
| 74 | Metronidazole                      | MTZ   | Azole        | parent  | Human/V<br>et | 443-48-1     |                              | 171.06       | C6H9N3O3          | HPC               |
| 75 | Hydroxy<br>metronidazole           | hMTZ  | Azole        | TP      |               | 4812-40-2    |                              | 187.06       | C6H9N3O4          | TRC               |
| 76 | Clindamycin                        | CLI   | Lincosamide  | parent  | Human/V<br>et | 18323-44-9   | Hydrochloride                | 424.18       | C18H33ClN2O<br>5S | TRC               |
| 77 | Clindamycin<br>sulfoxide           | CSO   | Lincosamide  | TP      |               | 22431-46-5   |                              | 440.17       | C18H33ClN2O<br>6S | TRC               |
| 78 | Lincomycin                         | LIN   | Lincosamide  | parent  | Human/V<br>et | 154-21-2     | Hydrochloride<br>monohydrate | 406.21       | C18H34N2O6S       | LGC               |
| 79 | Rifampicin                         | RFP   | Rifamycin    | parent  | Human         | 13292-46-1   |                              | 822.41       | C43H58N4O12       | HPC               |
| 80 | Rifaximin                          | RFX   | Rifamycin    | parent  | Human         | 80621-81-4   |                              | 785.35       | C43H51N3O11       | LGC               |
| 81 | Desacetyl rifaximin                | daRFX | Rifamycin    | TP      |               | 80621-88-1   |                              | 743.34       | C41H49N3O10       | TRC               |
| 82 | Chloramphenicol                    | CHL   | Amphenicol   | parent  | Human/V<br>et | 56-75-7      |                              | 322.01       | C11H12Cl2N2<br>O5 | Sigma-<br>Aldrich |
| 83 | 2-amino-1-(4-<br>nitrophenyl)-1,3- | ANP   | Amphenicol   | TP      |               | 716-61-0     |                              | 212.08       | C9H12N2O4         | Biosynth          |

|    | Name                        | Abbr. | Class A                  | Class B       | Class C       | CAS No.                                  | Salt form   | M.I.<br>mass | Formula                                                                | Supplier |
|----|-----------------------------|-------|--------------------------|---------------|---------------|------------------------------------------|-------------|--------------|------------------------------------------------------------------------|----------|
|    | propanediol                 |       |                          |               |               |                                          |             |              |                                                                        |          |
| 84 | Florfenicol                 | FF    | Amphenicol               | parent        | Vet           | 73231-34-2                               |             | 357.00       | C <sub>12</sub> H <sub>14</sub> Cl <sub>2</sub> FN<br>O <sub>4</sub> S | TRC      |
| 85 | Florfenicol amine           | FFA   | Amphenicol               | TP            |               | 76639-93-5                               |             | 247.07       | C <sub>10</sub> H <sub>14</sub> FNO <sub>3</sub> S                     | HPC      |
| 86 | Tazobactam                  | TAZ   | β-lactamase<br>inhibitor | parent        | Human         | 89786-04-9                               |             | 300.05       | C <sub>10</sub> H <sub>12</sub> N <sub>4</sub> O <sub>5</sub> S        | TRC      |
| 87 | Tazobactam M1<br>metabolite | TAZ-M | β-lactamase<br>inhibitor | TP            |               | 118175-11-4                              |             | 248.06       | C <sub>7</sub> H <sub>12</sub> N <sub>4</sub> O <sub>4</sub> S         | Biosynth |
| 88 | Trimethoprim                | TMP   | Diaminopyrim<br>idine    | parent        | Human/V<br>et | 738-70-5                                 |             | 290.14       | C <sub>14</sub> H <sub>18</sub> N <sub>4</sub> O <sub>3</sub>          | HPC      |
| 89 | Hydroxy<br>trimethoprim     | hTMP  | Diaminopyrim<br>idine    | TP            |               | 112678-48-5                              |             | 306.13       | C <sub>14</sub> H <sub>18</sub> N <sub>4</sub> O <sub>4</sub>          | TRC      |
| 90 | Linezolid                   | LZD   | Oxazolidinone            | parent        | Human         | 165800-03-3                              |             | 337.14       | C <sub>16</sub> H <sub>20</sub> FN <sub>3</sub> O <sub>4</sub>         | TRC      |
| 91 | PNU 142586                  | PNU   | Oxazolidinone            | TP            |               | 189038-36-6                              | Sodium salt | 353.14       | C <sub>16</sub> H <sub>20</sub> FN <sub>3</sub> O <sub>5</sub>         | TRC      |
| 92 | Gentamicin C1 #             | GEN1  | Aminoglycosi<br>de       | parent        | Human/V<br>et | 25876-10-2                               | Sulfate     | 477.32       | C <sub>21</sub> H <sub>43</sub> N <sub>5</sub> O <sub>7</sub>          | HPC      |
| 93 | Gentamicin C1a #            | GEN1a | Aminoglycosi<br>de       | parent        | Human/V<br>et | 26098-04-4                               | Sulfate     | 449.28       | C <sub>19</sub> H <sub>39</sub> N <sub>5</sub> O <sub>7</sub>          | HPC      |
| 94 | Gentamicin<br>C2,C2a,C2b #  | GEN2  | Aminoglycosi<br>de       | parent        | Human/V<br>et | 25876-11-3,<br>59751-72-3,<br>52093-21-7 | Sulfate     | 463.30       | C <sub>20</sub> H <sub>41</sub> N <sub>5</sub> O <sub>7</sub>          | HPC      |
| 95 | Neomycin                    | NEO   | Aminoglycosi<br>de       | parent        | Human/V<br>et | 119-04-0                                 | Acetate     | 614.31       | C <sub>23</sub> H <sub>46</sub> N <sub>6</sub> O <sub>13</sub>         | TRC      |
| 96 | Colistin A #                | COL-A | Cyclic<br>polypeptide    | parent/T<br>P | Human         | 7722-44-3                                | Sulfate     | 1168.77      | C <sub>53</sub> H <sub>100</sub> N <sub>16</sub> O<br>13               | LGC      |
| 97 | Colistin B #                | COL-B | Cyclic<br>polypeptide    | parent/T<br>P | Human         | 7239-48-7                                | Sulfate     | 1154.75      | C <sub>52</sub> H <sub>98</sub> N <sub>16</sub> O<br>3                 | LGC      |
| 98 | Fusidic acid                | FA    | Fusidane                 | parent        | Human/V       | 6990-06-3                                |             | 516.35       | C <sub>31</sub> H <sub>48</sub> O <sub>6</sub>                         | TRC      |

|     | Name           | Abbr. | Class A      | Class B | Class C | CAS No.    | Salt form  | M.I.<br>mass | Formula                                                                           | Supplier |
|-----|----------------|-------|--------------|---------|---------|------------|------------|--------------|-----------------------------------------------------------------------------------|----------|
|     |                |       |              |         | et      |            |            |              |                                                                                   |          |
| 99  | Meropenem      | MER   | Carbapenem   | parent  | Human   | 96036-03-2 | Trihydrate | 383.15       | C <sub>17</sub> H <sub>25</sub> N <sub>3</sub> O <sub>5</sub> S                   | HPC      |
| 100 | Nitrofurantoin | NIT   | Nitrofuran   | parent  | Human   | 67-20-9    |            | 238.03       | C <sub>8</sub> H <sub>6</sub> N <sub>4</sub> O <sub>5</sub>                       | HPC      |
| 101 | Salinomycin    | SAL   | Ionophore    | parent  | Vet     | 53003-10-4 |            | 750.49       | C <sub>42</sub> H <sub>70</sub> O <sub>11</sub>                                   | TRC      |
| 102 | Vancomycin     | VAN   | Glycopeptide | parent  | Human   | 1404-90-6  |            | 1447.43      | C <sub>66</sub> H <sub>75</sub> Cl <sub>2</sub> N <sub>9</sub><br>O <sub>24</sub> | TRC      |

M.I., Mass, monoisotopic mass; TP, antimicrobial transformation product; Human, human antimicrobial; Vet, veterinary antimicrobial.

Compounds containing isomers were not separated in this method.

#, One standard used for all forms within the drug complex.

&, Salt corrections considered in all calculations, i.e., analysis of the free base.

<sup>a</sup>, Antimicrobial not registered in Australia for any purpose of use

Li J, Shimko KM, He C, Patterson B, Bade R, Shiels R, et al. Direct injection liquid chromatography-tandem mass spectrometry as a sensitive and high-throughput method for the quantitative surveillance of antimicrobials in wastewater. Science of the Total Environment 2023; 900: 165825.

## Quality Assurance/Quality Control Results

**Table S2:** Calibration and quality control results.

| Name             | Abbr.  | Cali_Lower_Range | Cali_Upper_Range | LOQ_ppb | $R^2$ | QAQC_1ppb | QAQC_10ppb | Table S3: Raw antibiotic data from influent analysis. |
|------------------|--------|------------------|------------------|---------|-------|-----------|------------|-------------------------------------------------------|
| Ampicillin       | AMP    | 0.05             | 20               | 0.05    | 0.998 | 1.20      | 9.95       |                                                       |
| Cefalexin        | CFX    | 0.01             | 20               | 0.01    | 0.996 | 1.20      | 10.73      |                                                       |
| Ciprofloxacin    | CIP    | 0.1              | 20               | 0.1     | 0.993 | 0.81      | 9.45       |                                                       |
| Norfloxacin      | NOR    | 0.05             | 20               | 0.05    | 0.994 | 0.78      | 10.09      |                                                       |
| Ofloxacin        | OFL    | 0.05             | 10               | 0.05    | 0.990 | /         | 0.74       |                                                       |
| Sulfadiazine     | SDZ    | 0.01             | 10               | 0.01    | 0.995 | 1.24      | 11.01      |                                                       |
| Sulfamethoxazole | SMX    | 0.005            | 20               | 0.005   | 0.993 | /         | 12.23      |                                                       |
| Sulfapyridine    | SPY    | 0.01             | 10               | 0.01    | 0.994 | 1.09      | 11.47      |                                                       |
| Erythromycin-H2O | ERY-18 | 0.01             | 10               | 0.01    | 0.995 | 1.13      | 11.96      |                                                       |
| Tilmicosin       | TIL    | 0.01             | 20               | 0.01    | 0.990 | 0.46      | 8.64       |                                                       |
| Doxycycline      | DOX    | 0.05             | 20               | 0.05    | 0.991 | 0.79      | 10.01      |                                                       |
| Tetracycline     | TET    | 0.05             | 5                | 0.05    | 0.964 | 0.96      | 9.84       |                                                       |
| Fluconazole      | FCZ    | 0.01             | 10               | 0.01    | 0.993 | 0.90      | 9.66       |                                                       |
| Metronidazole    | MTZ    | 0.01             | 10               | 0.01    | 0.995 | 0.70      | 9.46       |                                                       |
| Clindamycin      | CLI    | 0.01             | 10               | 0.01    | 0.997 | 0.97      | 8.52       |                                                       |
| Lincomycin       | LIN    | 0.01             | 5                | 0.01    | 0.993 | 0.94      | 8.78       |                                                       |
| Rifaximin        | RFX    | 0.01             | 20               | 0.01    | 0.996 | 1.08      | 12.25      |                                                       |
| Trimethoprim     | TMP    | 0.01             | 20               | 0.01    | 0.996 | /         | 8.17       |                                                       |
| Linezolid        | LZD    | 0.05             | 10               | 0.05    | 0.997 | 0.88      | 9.54       |                                                       |

/; background concentration was too high to get the concentration of QC spiking at 1ppb.

| Sample Name          | Ampicillin | Cephalexin | Ciprofloxacin | Clindamycin | Norfloxacin | Sulfadiazine | Sulfapyridine | Erythromycin-18 | Tilmicosin | Doxycycline | Tetracycline |
|----------------------|------------|------------|---------------|-------------|-------------|--------------|---------------|-----------------|------------|-------------|--------------|
| 16/11/2023           |            |            | 0.373         | 0.018       | 0.114       | <LOQ         | 0.865         | 0.029           |            | 0.338       |              |
| 23/11/2023           |            |            | 0.792         | 0.031       | 0.133       | <LOQ         | 0.886         | 0.017           |            | 0.990       |              |
| 30/11/2023           |            |            | 0.324         | 0.015       | 0.097       | <LOQ         | 0.727         | 0.024           |            | 0.468       |              |
| 7/12/2023            |            |            | 0.429         | 0.015       | 0.084       | <LOQ         | 0.531         | 0.017           |            | 3.212       |              |
| 8/12/2023            |            | 0.011      | 1.665         | 0.017       |             |              | 0.267         | 0.017           |            | 1.602       |              |
| 11/12/2023           |            | 0.031      | 2.393         | 0.024       | 0.071       | <LOQ         | 0.225         | 0.024           | 0.057      | 1.063       |              |
| 14/12/2023           |            |            | 0.130         | 0.020       | 0.069       | <LOQ         | 0.500         | 0.025           | 0.707      | 2.136       |              |
| 14/12/2023           |            |            | 1.747         | 0.026       | 0.065       |              | 0.516         | 0.014           | 7.998      | 2.787       |              |
| 21/12/2023           |            |            | 0.419         | 0.021       | 0.080       |              | 0.608         | 0.027           | 3.385      | 12.600      | 0.161        |
| 28/12/2023           | 0.183      | 0.185      | 0.300         | 0.027       | 0.092       | <LOQ         | 0.515         | 0.025           | 0.804      | 3.646       | 0.410        |
| 28/12/2023 duplicate | 0.183      | 0.181      | 0.290         | 0.029       | 0.085       | <LOQ         | 0.537         | 0.024           | 0.842      | 3.585       | 0.462        |

Concentration is at µg/L.

Cells without value indicate <LODs (limits of detection).

LOQ, limit of quantification.

#### Results for **10** times diluted samples.

| Sample Name | Fluconazole | Metronidazole | Lincomycin | Rifaximin | Linezolid | Ofloxacin     | Sulfamethoxazole | Trimethoprim |
|-------------|-------------|---------------|------------|-----------|-----------|---------------|------------------|--------------|
| 16/11/2023  | 0.288       | 0.016         |            |           |           | <u>12.800</u> | 2.782            | 0.746        |
| 23/11/2023  | 0.332       |               |            |           |           | <u>24.440</u> | 3.717            | 2.013        |
| 30/11/2023  | 0.231       |               |            |           |           | <u>10.710</u> | <u>33.780</u>    | 7.554        |
| 7/12/2023   | 0.282       | 0.089         | 0.085      | 0.088     |           | <u>10.590</u> | <u>59.010</u>    | 18.622       |
| 8/12/2023   | 0.148       | 1.035         | 0.014      |           |           | <u>9.725</u>  | 6.749            | 0.993        |
| 11/12/2023  | 0.122       | 0.021         | 0.013      |           |           | <u>4.211</u>  | 3.513            | 0.359        |
| 14/12/2023  | 1.116       | 2.206         | <LOQ       |           | <LOQ      | <u>4.356</u>  | <u>22.630</u>    | 3.905        |
| 14/12/2023  | 0.192       | 3.827         | 0.021      |           |           | <u>6.280</u>  | <u>20.060</u>    | 6.844        |

|            |       |       |       |        |       |
|------------|-------|-------|-------|--------|-------|
| 21/12/2023 | 0.237 |       | 5.262 | 20.765 | 3.294 |
| 28/12/2023 | 0.370 | 0.664 | 4.936 | 0.724  | 0.280 |
| 28/12/2023 |       |       |       |        |       |
| duplicate  | 0.403 | 0.696 | 4.908 | 0.786  | 0.305 |

Concentration is at µg/L.

Cells without value indicate <LODs (limits of detection).

LOQ, limit of quantification.

Results for **10** times diluted samples.

**Table S4:** Raw data for antibiotics and removal efficiencies between 16th November 2023 and 8th February 2024 for Pearson correlation  $r$  analyses and two-sample t-tests.

|            | Doxycyclin<br>e (ug/L) | Ampicilli<br>n (ug/L) | Tilmicosi<br>n (ug/L) | Metronidazol<br>e (ug/L) | Ciprofloxaci<br>n (ug/L) | Ofloxaci<br>n (ug/L) | Sulfadiazin<br>e (ug/L) | Sulfamethoxazol<br>e (ug/L) | Trimethopri<br>m (ug/L) | Denitrificatio<br>n % | Nitrificatio<br>n % | COD<br>Remova<br>l % |
|------------|------------------------|-----------------------|-----------------------|--------------------------|--------------------------|----------------------|-------------------------|-----------------------------|-------------------------|-----------------------|---------------------|----------------------|
| 16/11/2023 | 0.337971               | 0.025                 | 0.005                 | 0.015923                 | 0.373077                 | 12.8                 | 0.005                   | 2.7821616                   | 0.746418                | 99.63%                | 96.13%              | 98.66%               |
| 23/11/2023 | 0.989622               | 0.025                 | 0.005                 | 0.005                    | 0.792087                 | 24.44                | 0.005                   | 3.7172888                   | 2.013364                | 100.00%               | 96.59%              | 94.89%               |
| 30/11/2023 | 0.467562               | 0.025                 | 0.005                 | 0.005                    | 0.323798                 | 10.71                | 0.005                   | 33.78                       | 7.55385                 | 99.28%                | 62.77%              | 95.97%               |
| 7/12/2023  | 3.212085               | 0.025                 | 0.005                 | 0.088821                 | 0.428733                 | 10.59                | 0.005                   | 59.01                       | 18.62186                | 96.96%                | 32.53%              | 87.62%               |
| 14/12/2023 | 2.787038               | 0.025                 | 7.99795               | 3.827446                 | 1.747001                 | 6.28                 | 0.005                   | 20.06                       | 6.84366                 | 99.44%                | 63.10%              | 94.36%               |
|            |                        |                       |                       |                          |                          | 5.26203              |                         |                             |                         |                       |                     |                      |
| 21/12/2023 | 12.59984               | 0.025                 | 3.385212              | 0.005                    | 0.418595                 | 7                    | 0.005                   | 20.764557                   | 3.29415                 | 62.17%                | 85.11%              | 96.67%               |
|            |                        |                       |                       |                          |                          | 4.93588              |                         |                             |                         |                       |                     |                      |
| 28/12/2023 | 3.64586                | 0.183                 | 0.803995              | 0.664175                 | 0.300211                 | 7                    | 0.005                   | 0.7242257                   | 0.279916                | 97.89%                | 93.32%              | 95.35%               |
|            |                        |                       |                       |                          |                          | 2.38672              |                         |                             |                         |                       |                     |                      |
| 4/01/2024  | 1.891275               | 0.025                 | 0.155504              | 0.036532                 | 0.204872                 | 7                    | 0.007296                | 2.6809516                   | 0.729858                | 92.09%                | 88.86%              | 71.99%               |
|            |                        |                       |                       |                          |                          | 5.96758              |                         |                             |                         |                       |                     |                      |
| 11/01/2024 | 1.212188               | 0.025                 | 0.52719               | 0.072019                 | 0.213865                 | 1                    | 0.014695                | 1.3109851                   | 0.889058                | 99.32%                | 79.56%              | 95.60%               |
|            |                        |                       |                       |                          |                          | 9.42320              |                         |                             |                         |                       |                     |                      |
| 18/01/2024 | 1.040776               | 0.025                 | 0.099148              | 0.247276                 | 0.198331                 | 6                    | 0.004872                | 0.3626898                   | 0.394299                | 98.50%                | 96.18%              | 97.23%               |
| 25/01/2024 | 0.025                  | 0.025                 | 0.005                 | 0.005                    | 0.05                     | 0.025                | 0.005                   | 0.0025                      | 0.0025                  | 88.38%                | 91.22%              | 90.67%               |
| 1/02/2024  | 2.175689               | 0.247054              | 0.005                 | 0.150351                 | 0.351878                 | 5.42442              | 0.584138                | 5.9427682                   | 2.536537                | 86.24%                | 83.87%              | 95.19%               |
|            |                        |                       |                       |                          |                          | 8.33778              |                         |                             |                         |                       |                     |                      |
| 8/02/2024  | 1.173476               | 0.376172              | 0.005                 | 0.111279                 | 0.271631                 | 2                    | 0.777856                | 0.6904332                   | 0.359945                | 92.23%                | 83.56%              | 95.56%               |

**Table S5:** Pearson correlation  $r$  calculations for antibiotics and removal efficiencies.

|                         | Doxycyclin<br>e (ug/L) | Ampicillin<br>(ug/L) | Tilmicosin<br>(ug/L) | Metronida<br>zole (ug/L) | Ciprofloxaci<br>n (ug/L) | Ofloxacin<br>(ug/L) | Sulfadiazin<br>e (ug/L) | Sulfamethoxaz<br>ole (ug/L) | Trimethopri<br>m (ug/L) | Denitrificat<br>ion % | Nitrificatio<br>n % | COD<br>Removal % |
|-------------------------|------------------------|----------------------|----------------------|--------------------------|--------------------------|---------------------|-------------------------|-----------------------------|-------------------------|-----------------------|---------------------|------------------|
| Pearson Correlation $r$ |                        |                      |                      |                          |                          |                     |                         |                             |                         |                       |                     |                  |
| Doxycycline (ug/L)      | 1                      |                      |                      |                          |                          |                     |                         |                             |                         |                       |                     |                  |
| Ampicillin (ug/L)       | -0.06353               | 1                    |                      |                          |                          |                     |                         |                             |                         |                       |                     |                  |

|                         |                 |                 |                 |                 |          |          |          |                  |                 |          |          |   |
|-------------------------|-----------------|-----------------|-----------------|-----------------|----------|----------|----------|------------------|-----------------|----------|----------|---|
| Tilmicosin (ug/L)       | 0.416911        | -0.19126        | 1               |                 |          |          |          |                  |                 |          |          |   |
| Metronidazole (ug/L)    | 0.039279        | -0.07856        | <b>0.901927</b> | 1               |          |          |          |                  |                 |          |          |   |
| Ciprofloxacin (ug/L)    | 0.116181        | -0.16142        | <b>0.849723</b> | <b>0.886414</b> | 1        |          |          |                  |                 |          |          |   |
| Ofloxacin (ug/L)        | -0.19551        | -0.13664        | -0.17961        | -0.12825        | 0.27101  | 1        |          |                  |                 |          |          |   |
| Sulfadiazine (ug/L)     | -0.11398        | <b>0.910054</b> | -0.19338        | -0.1175         | -0.13271 | -0.08472 | 1        |                  |                 |          |          |   |
| Sulfamethoxazole (ug/L) | 0.264425        | -0.28611        | 0.166033        | 0.103297        | 0.235167 | 0.127698 | -0.22245 | 1                |                 |          |          |   |
| Trimethoprim (ug/L)     | 0.141153        | -0.24908        | 0.157568        | 0.167406        | 0.29487  | 0.168636 | -0.18337 | <b>0.9723641</b> | 1               |          |          |   |
| Denitrification %       | <b>-0.83404</b> | -0.08078        | -0.16799        | 0.21277         | 0.182043 | 0.380115 | -0.14792 | -0.039166        | 0.097338        | 1        |          |   |
| Nitrification %         | -0.08097        | 0.143511        | -0.23095        | -0.2587         | -0.29672 | 0.021047 | 0.066769 | <b>-0.921657</b> | <b>-0.94606</b> | -0.12194 | 1        |   |
| COD Removal %           | 0.074489        | 0.182131        | 0.120065        | 0.082436        | 0.141552 | 0.329718 | 0.144205 | -0.091516        | -0.12755        | 0.009255 | 0.147492 | 1 |

**Table S6:** Two-sample t-tests (assuming unequal variances) for selected antibiotics and removal efficiencies.

|                              | <i>DOXY</i>     | <i>DENIT</i> |                              | <i>TRIM</i>     | <i>NITR</i> |                              | <i>SULF</i>     | <i>NITR</i> |
|------------------------------|-----------------|--------------|------------------------------|-----------------|-------------|------------------------------|-----------------|-------------|
| Mean                         | 2.425645        | 0.932402     | Mean                         | 3.40484         | 0.809844    | Mean                         | 11.67893        | 0.809844    |
| Variance                     | 10.59975        | 0.010849     | Variance                     | 26.96205        | 0.033809    | Variance                     | 312.549         | 0.033809    |
| Observations                 | 13              | 13           | Observations                 | 13              | 13          | Observations                 | 13              | 13          |
| <b>Pearson Correlation</b>   | <b>-0.83404</b> |              | <b>Pearson Correlation</b>   | <b>-0.94606</b> |             | <b>Pearson Correlation</b>   | <b>-0.92166</b> |             |
| Hypothesized Mean Difference | 0               |              | Hypothesized Mean Difference | 0               |             | Hypothesized Mean Difference | 0               |             |
| df                           | 12              |              | df                           | 12              |             | df                           | 12              |             |
| t Stat                       | 1.610474        |              | t Stat                       | 1.743388        |             | t Stat                       | 2.195629        |             |
| P(T<=t) one-tail             | 0.066635        |              | P(T<=t) one-tail             | 0.053402        |             | P(T<=t) one-tail             | 0.024258        |             |
| t Critical one-tail          | 1.782288        |              | t Critical one-tail          | 1.782288        |             | t Critical one-tail          | 1.782288        |             |
| <b>P(T&lt;=t) two-tail</b>   | <b>0.133269</b> |              | <b>P(T&lt;=t) two-tail</b>   | <b>0.106805</b> |             | <b>P(T&lt;=t) two-tail</b>   | <b>0.048516</b> |             |
| t Critical two-tail          | 2.178813        |              | t Critical two-tail          | 2.178813        |             | t Critical two-tail          | 2.178813        |             |



## Results and Discussion SI

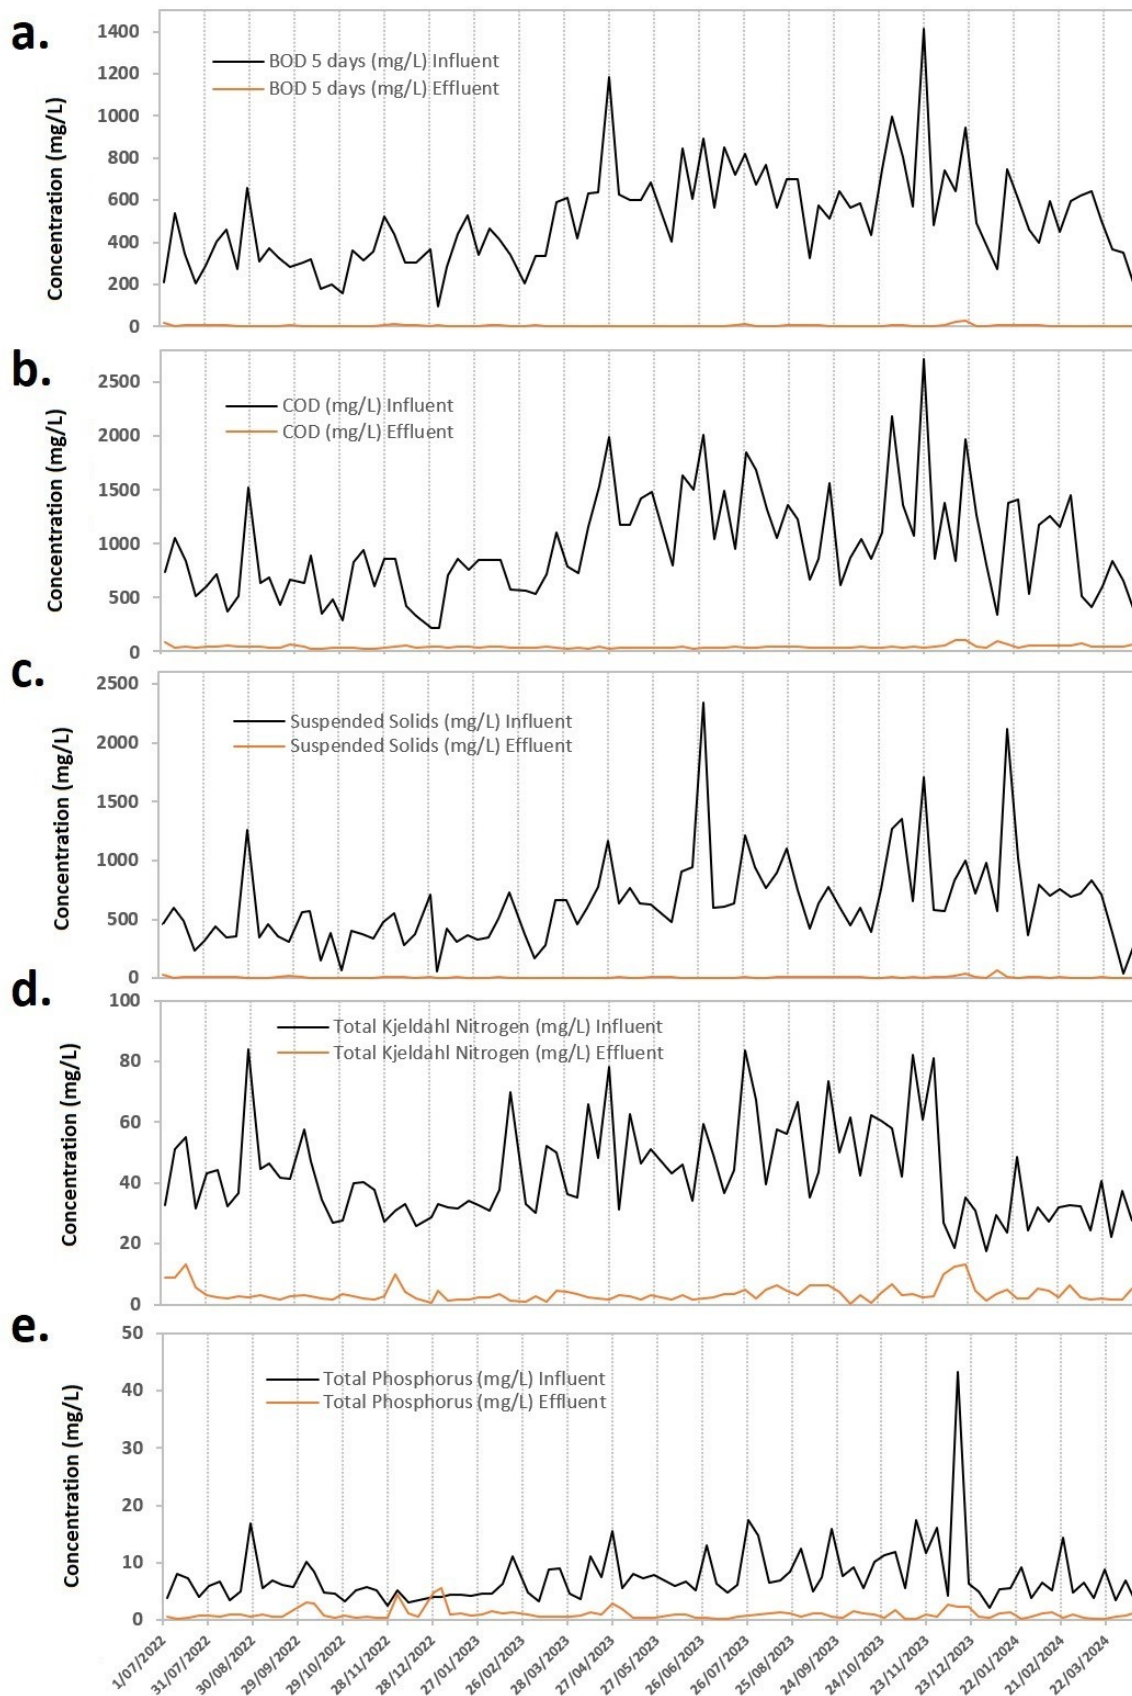

**Figure S2** Stacked scatter plots depicting temporal influent and effluent concentrations between 1<sup>st</sup> July 2022 and 22<sup>nd</sup> April 2024 for biochemical oxygen demand (BOD) (a), chemical oxygen demand (COD), (b). suspended solids (c), total Kjeldahl nitrogen (TKN) (d) and total phosphorous (TP) (e).

### WWTP Influent and Effluent Characteristics and Removal Efficiencies

Approaching the predicted toxic shock period, there is a notable spike in influent concentrations for BOD and COD on 23rd November 2023, at 1400 mg/L and 2700 mg/L, respectively. BOD and COD are measures of the amount of oxygen required to biologically or chemically oxidise any organic material present in solution, therefore elevated concentrations can indicate the presence of possibly harmful chemicals such as hydrocarbons that lead to toxic shocks. However, there was no immediate effect on WWTP biological treatment processes observed. Following this, effluent BOD and COD increased to 23 mg/L and 105 mg/L on 14th December 2023, corresponding to the removal efficiencies of 96% for BOD and 88% for COD during this period. Although the removal efficiencies remained high, the BOD concentration in the effluent exceeded the compliance limit of 20 mg/L. COD removal efficiency experienced a decline to 72% on 11th January 2024. Concurrently, the effluent concentration for SS increased to 38 mg/L on 21st December 2023 (96% removal) and 66 mg/L on 11th January 2024 (88% removal), exceeding the compliance limit of 30 mg/L.

There was a notable increase in influent TP concentration on 14th December 2023 to 43 mg/L but no change in TKN. As with BOD, COD and SS, there were increases in effluent concentrations for both TP and TKN on 7th and 14th December 2023, to 2.7 mg/L (35% removal) and 13 mg/L (33% removal) respectively. Although the outliers were noted as a reflection of worsening treatment performance, no effluent compliance limits were breached. The decline in effluent quality was indicative of a toxic shock event occurring, first noticed in samples taken on 7th December 2023.

### **WWTP Influent Chromium**

Chromium was detected at higher concentration levels (averaging  $0.13 \pm 0.07$  mg/L) in the WWTP influent between 1st July 2022 and 22nd April 2024, compared to other local WWTPs (average  $<0.03$  mg/L), as seen in Figure 2 (d). The high chromium concentrations at this WWTP are attributed to one of nine major industrial trade waste sites, a cement product manufacturer, which can contribute up to 20% of daily total influent flows. Chromium is considered in this study as a potential cause of the toxic shock due to the high concentrations observed, and literature indicates chromium can have individual or synergistic effects on biological treatment processes, especially in hexavalent form.(53-54) However, the chromium concentrations during the period of toxic shock event were 0.05–0.27 mg/L, which was consistent with normal concentrations in the wastewater influent to this WWTP. There are no observable events across the period in this study that could indicate a correlation between chromium and the decreased nitrogen and COD removal efficiencies.

### **WWTP Rainfall and Temperature Impacts**

Daily maximum air temperature and total rainfall data were also monitored (see Figure 2 (e)) to exclude possible seasonal effects on the biological treatment processes. The mean maximum daily air temperature for the WWTP was  $27 \pm 4$  °C from the period 1st July 2022 to 22nd April 2024, with this rising to  $31 \pm 3$  °C during the toxic shock period. This rise is common during the summer season in Southeast Queensland. The average daily rainfall measurement for the same period was  $3 \pm 9$  mm, rising to  $8 \pm 17$  mm during the toxic shock period, which is also common during summer. The decreases in nitrogen and COD removal efficiencies are not observed to correspond to any ongoing air temperatures or rainfall events. Conversely, some of the rainfall events during the toxic shock period may have diluted the chemical spill or toxic shock event, with a noticeable but brief recovery of contaminant removal efficiencies. This is difficult to correlate since the removal efficiencies are calculated weekly, compared to the daily rainfall measurements.

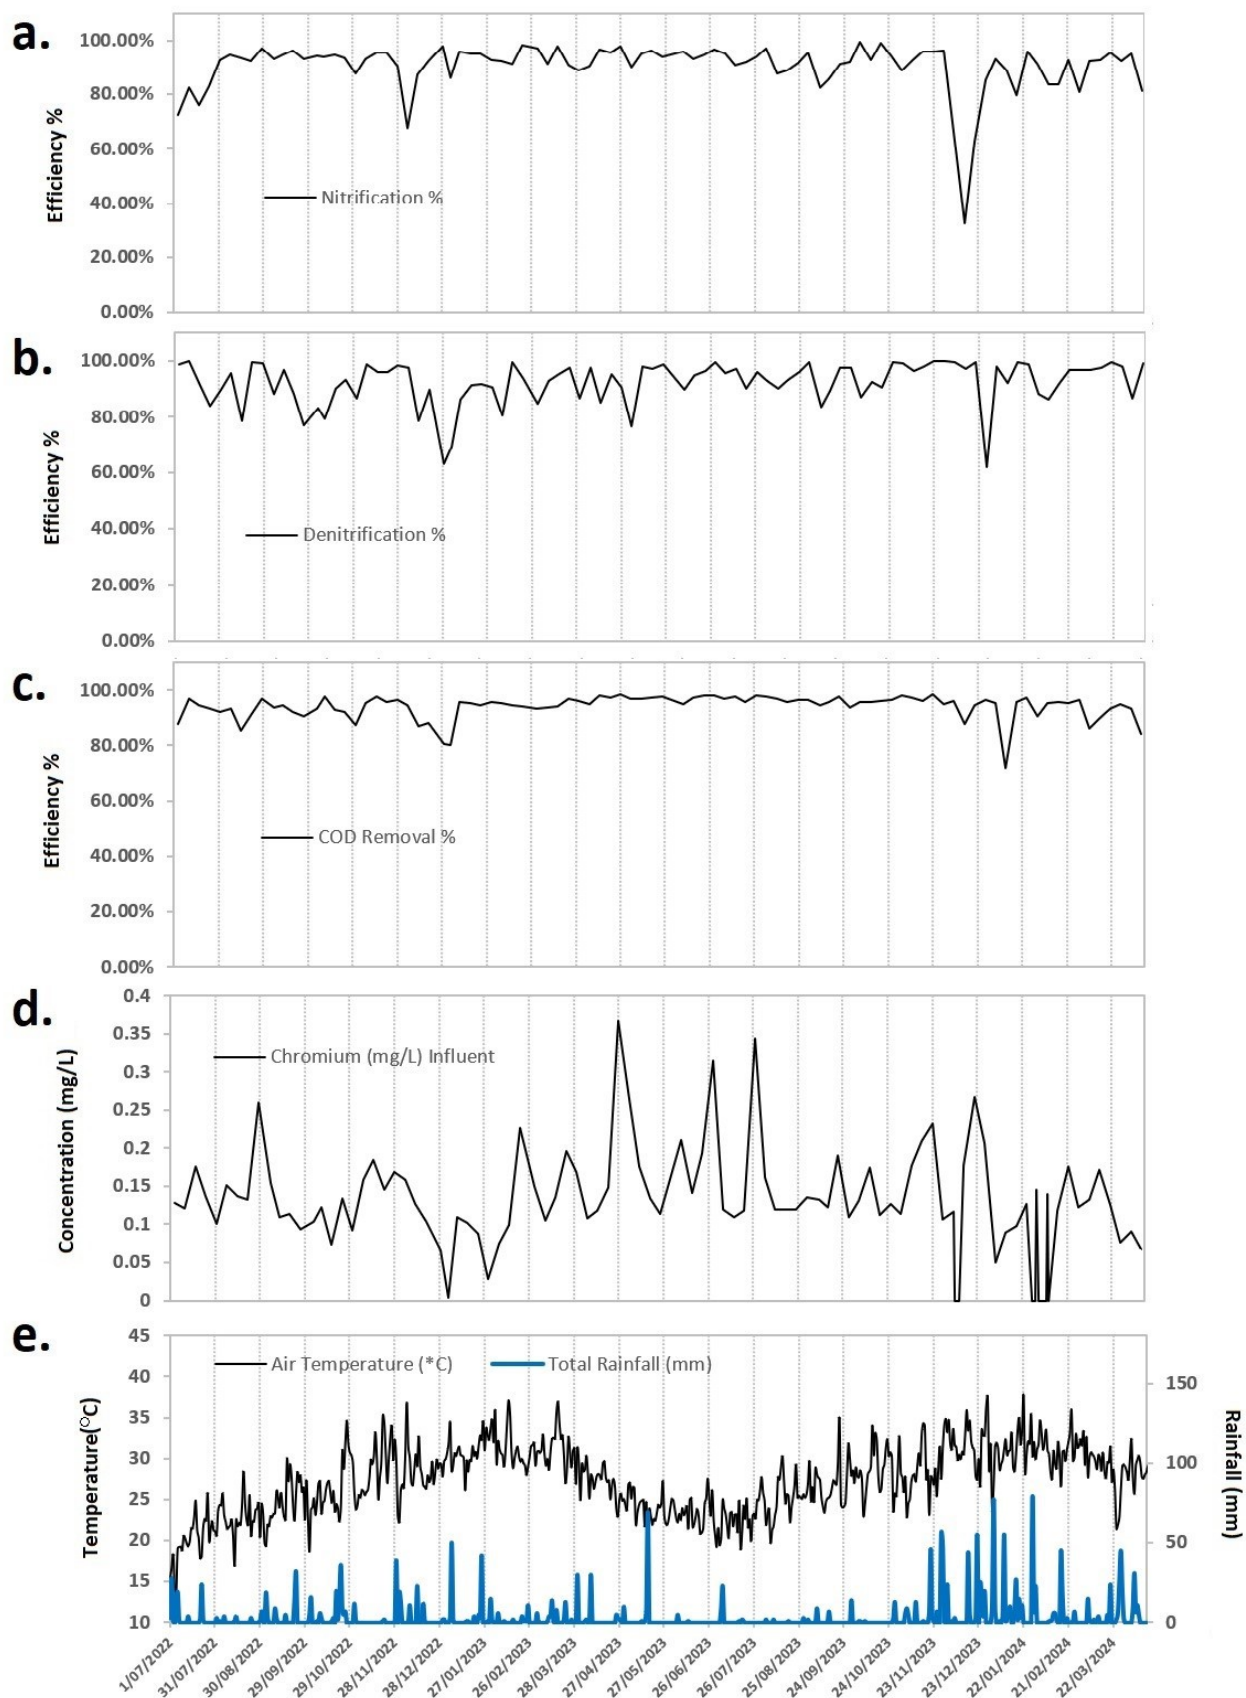

**Figure S3** Stacked scatter plots depicting temporal nitrification efficiency (a), denitrification efficiency (b), COD removal efficiency (c), chromium concentrations (d) and daily rainfall totals and maximum air temperatures (e) between 1<sup>st</sup> July 2022 and 22<sup>nd</sup> April 2024.



|                 |          |          |         |      |         |      |         |         |           |         |          |          |          |         |         |         |         |      |         |         |         |         |         |      |         |         |      |         |         |         |          |         |      |          |         |         |      |          |         |      |      |
|-----------------|----------|----------|---------|------|---------|------|---------|---------|-----------|---------|----------|----------|----------|---------|---------|---------|---------|------|---------|---------|---------|---------|---------|------|---------|---------|------|---------|---------|---------|----------|---------|------|----------|---------|---------|------|----------|---------|------|------|
| Lidocaine       | n.d.     | n.d.     | 0.0624  | n.d. | 0.10152 | n.d. | n.d.    | n.d.    | 0.01272   | n.d.    | 3.4424   | n.d.     | n.d.     | 0.77454 | n.d.    | n.d.    | n.d.    | n.d. | n.d.    | n.d.    | n.d.    | 13.8616 | 0.22204 | n.d. | n.d.    | n.d.    | n.d. | n.d.    | n.d.    | n.d.    | n.d.     | n.d.    | n.d. | n.d.     | n.d.    | n.d.    | n.d. | n.d.     | n.d.    | n.d. |      |
| MDA             | n.d.     | n.d.     | n.d.    | n.d. | n.d.    | n.d. | n.d.    | n.d.    | 0.45552   | n.d.    | n.d.     | n.d.     | n.d.     | n.d.    | n.d.    | n.d.    | n.d.    | n.d. | n.d.    | n.d.    | n.d.    | n.d.    | n.d.    | n.d. | n.d.    | n.d.    | n.d. | n.d.    | 0.3172  | n.d.    | n.d.     | n.d.    | n.d. | n.d.     | n.d.    | n.d.    | n.d. | n.d.     | n.d.    |      |      |
| MDMA            | n.d.     | n.d.     | n.d.    | n.d. | n.d.    | n.d. | n.d.    | n.d.    | n.d.      | n.d.    | n.d.     | n.d.     | n.d.     | n.d.    | n.d.    | n.d.    | n.d.    | n.d. | n.d.    | n.d.    | n.d.    | n.d.    | n.d.    | n.d. | n.d.    | n.d.    | n.d. | n.d.    | 3.39612 | n.d.    | n.d.     | n.d.    | n.d. | n.d.     | n.d.    | n.d.    | n.d. | n.d.     | n.d.    |      |      |
| Mephedrone      | n.d.     | n.d.     | n.d.    | n.d. | n.d.    | n.d. | n.d.    | n.d.    | n.d.      | n.d.    | n.d.     | n.d.     | n.d.     | n.d.    | n.d.    | n.d.    | n.d.    | n.d. | n.d.    | n.d.    | n.d.    | n.d.    | n.d.    | n.d. | n.d.    | n.d.    | n.d. | n.d.    | n.d.    | n.d.    | n.d.     | n.d.    | n.d. | n.d.     | n.d.    | n.d.    | n.d. | n.d.     | n.d.    | n.d. |      |
| Methamphetamine | n.d.     | 0.043056 | 0.01807 | n.d. | 0.45432 | n.d. | n.d.    | n.d.    | 0.0096944 | 1.42708 | 0.01n.d. | 0.022724 | 0.085722 | 0.01144 | n.d.    | 0.01456 | n.d.    | n.d. | n.d.    | 0.0325  | 0.22608 | 0.48328 | 0.14024 | n.d. | n.d.    | 0.02748 | n.d. | 0.01118 | n.d.    | 0.18434 | 0.013208 | n.d.    | n.d. | n.d.     | n.d.    | n.d.    | n.d. | 0.094562 | n.d.    | n.d. |      |
| Nicotine        | n.d.     | n.d.     | n.d.    | n.d. | n.d.    | n.d. | n.d.    | n.d.    | 1.5888    | n.d.    | n.d.     | n.d.     | 6.04188  | n.d.    | n.d.    | n.d.    | n.d.    | n.d. | n.d.    | n.d.    | n.d.    | 6.95942 | n.d.    | n.d. | n.d.    | n.d.    | n.d. | n.d.    | n.d.    | n.d.    | n.d.     | n.d.    | n.d. | n.d.     | n.d.    | n.d.    | n.d. | n.d.     | n.d.    | n.d. | n.d. |
| Oxycodone       | 19.65408 | n.d.     | n.d.    | n.d. | n.d.    | n.d. | n.d.    | n.d.    | n.d.      | n.d.    | n.d.     | n.d.     | n.d.     | n.d.    | n.d.    | n.d.    | n.d.    | n.d. | n.d.    | n.d.    | n.d.    | n.d.    | n.d.    | n.d. | n.d.    | n.d.    | n.d. | n.d.    | n.d.    | n.d.    | n.d.     | n.d.    | n.d. | n.d.     | n.d.    | n.d.    | n.d. | n.d.     | n.d.    | n.d. |      |
| Paracetamol     | 38.05272 | n.d.     | n.d.    | n.d. | 1.86792 | n.d. | n.d.    | n.d.    | 0.00288   | 0.0024  | n.d.     | 0.25246  | n.d.     | 0.10894 | 0.0299  | n.d.    | n.d.    | n.d. | n.d.    | n.d.    | 0.27888 | 8.69674 | n.d.    | n.d. | n.d.    | n.d.    | n.d. | 0.0156  | n.d.    | n.d.    | 0.03978  | n.d.    | n.d. | n.d.     | n.d.    | n.d.    | n.d. | n.d.     | n.d.    | n.d. |      |
| Pseudoephedrine | 0.0732   | n.d.     | n.d.    | n.d. | n.d.    | n.d. | n.d.    | n.d.    | 0.03648   | 0.07152 | n.d.     | n.d.     | n.d.     | 0.13312 | n.d.    | n.d.    | n.d.    | n.d. | n.d.    | n.d.    | n.d.    | n.d.    | n.d.    | n.d. | n.d.    | n.d.    | n.d. | n.d.    | n.d.    | n.d.    | n.d.     | n.d.    | n.d. | n.d.     | n.d.    | n.d.    | n.d. | n.d.     | n.d.    | n.d. | n.d. |
| Salicylic acid  | 2.60886  | 0.69318  | 0.56498 | n.d. | 3.00336 | n.d. | 1.21872 | 20.0568 | 0.72072   | 2.03856 | 5.9982   | 32.87934 | 1.33484  | 1.19938 | 3.86906 | 0.46176 | 1.77034 | n.d. | 1.39984 | 0.60216 | 1.73952 | 21.2089 | 5.74262 | n.d. | 1.00516 | 1.0387  | n.d. | 0.50804 | n.d.    | 0.4576  | 3.01444  | 1.99992 | n.d. | 135.3576 | 2.99468 | 1.05976 | n.d. | n.d.     |         |      |      |
| Tapentadol      | 7.6428   | n.d.     | n.d.    | n.d. | 0.05136 | n.d. | n.d.    | n.d.    | 0.03456   | n.d.    | n.d.     | n.d.     | n.d.     | 0.03926 | n.d.    | n.d.    | n.d.    | n.d. | n.d.    | n.d.    | n.d.    | 0.33436 | n.d.    | n.d. | n.d.    | n.d.    | n.d. | n.d.    | n.d.    | n.d.    | n.d.     | n.d.    | n.d. | n.d.     | n.d.    | n.d.    | n.d. | n.d.     | n.d.    | n.d. | n.d. |
| Temazepam       | 99.72816 | n.d.     | n.d.    | n.d. | n.d.    | n.d. | n.d.    | n.d.    | 0.08928   | 0.04344 | n.d.     | n.d.     | n.d.     | 0.05772 | n.d.    | n.d.    | n.d.    | n.d. | n.d.    | n.d.    | n.d.    | n.d.    | n.d.    | n.d. | 2.20506 | n.d.    | n.d. | n.d.    | n.d.    | 0.41704 | 0.04004  | n.d.    | n.d. | n.d.     | 3.2592  | n.d.    | n.d. | n.d.     | n.d.    | n.d. |      |
| Tramadol        | 0.18288  | n.d.     | n.d.    | n.d. | n.d.    | n.d. | n.d.    | n.d.    | 0.02016   | 0.0108  | 0.09152  | n.d.     | n.d.     | 0.07332 | n.d.    | n.d.    | n.d.    | n.d. | n.d.    | n.d.    | n.d.    | 0.25194 | n.d.    | n.d. | n.d.    | n.d.    | n.d. | n.d.    | 0.2626  | n.d.    | n.d.     | n.d.    | n.d. | n.d.     | n.d.    | n.d.    | n.d. | n.d.     | n.d.    | n.d. | n.d. |
| Venlafaxine     | 0.05472  | n.d.     | n.d.    | n.d. | 0.06864 | n.d. | n.d.    | n.d.    | 0.21744   | n.d.    | 0.21866  | n.d.     | n.d.     | n.d.    | n.d.    | n.d.    | n.d.    | n.d. | n.d.    | n.d.    | n.d.    | 0.27196 | n.d.    | n.d. | n.d.    | n.d.    | n.d. | n.d.    | n.d.    | n.d.    | n.d.     | n.d.    | n.d. | n.d.     | n.d.    | n.d.    | n.d. | n.d.     | n.d.    | n.d. | n.d. |
| Atorvastatin    | 0.03408  | n.d.     | n.d.    | n.d. | 0.01872 | n.d. | n.d.    | n.d.    | n.d.      | n.d.    | n.d.     | n.d.     | n.d.     | n.d.    | n.d.    | n.d.    | n.d.    | n.d. | n.d.    | n.d.    | n.d.    | 0.07462 | n.d.    | n.d. | n.d.    | n.d.    | n.d. | n.d.    | n.d.    | n.d.    | n.d.     | n.d.    | n.d. | n.d.     | n.d.    | n.d.    | n.d. | n.d.     | n.d.    | n.d. | n.d. |
| Citalopram      | 18.6864  | n.d.     | n.d.    | n.d. | n.d.    | n.d. | n.d.    | n.d.    | 0.06576   | n.d.    | n.d.     | n.d.     | n.d.     | n.d.    | n.d.    | n.d.    | n.d.    | n.d. | n.d.    | n.d.    | n.d.    | 0.02938 | n.d.    | n.d. | n.d.    | n.d.    | n.d. | n.d.    | n.d.    | n.d.    | n.d.     | n.d.    | n.d. | n.d.     | n.d.    | n.d.    | n.d. | n.d.     | n.d.    | n.d. | n.d. |
| Diclofenac      | 0.08208  | n.d.     | 0.03718 | n.d. | n.d.    | n.d. | n.d.    | n.d.    | n.d.      | 0.04632 | 2.92552  | n.d.     | n.d.     | 0.13936 | n.d.    | n.d.    | n.d.    | n.d. | n.d.    | n.d.    | n.d.    | 1.6874  | 0.57694 | n.d. | n.d.    | 0.09178 | n.d. | n.d.    | n.d.    | n.d.    | n.d.     | n.d.    | n.d. | n.d.     | n.d.    | n.d.    | n.d. | n.d.     | 0.02834 | n.d. | n.d. |



|               |         |         |         |      |         |      |         |       |         |         |         |         |         |         |         |         |         |        |         |         |         |         |         |        |        |         |        |         |        |         |         |         |        |        |         |        |      |
|---------------|---------|---------|---------|------|---------|------|---------|-------|---------|---------|---------|---------|---------|---------|---------|---------|---------|--------|---------|---------|---------|---------|---------|--------|--------|---------|--------|---------|--------|---------|---------|---------|--------|--------|---------|--------|------|
| Methomyl      | n.d.    | n.d.    | n.d.    | n.d. | n.d.    | n.d. | n.d.    | n.d.  | n.d.    | n.d.    | n.d.    | n.d.    | n.d.    | n.d.    | n.d.    | n.d.    | n.d.    | n.d.   | n.d.    | n.d.    | n.d.    | n.d.    | n.d.    | n.d.   | n.d.   | n.d.    | n.d.   | n.d.    | n.d.   | n.d.    | n.d.    | n.d.    | n.d.   | n.d.   | n.d.    | n.d.   |      |
| Metolachlor   | 0.07032 | 0.01638 | 0.03484 | n.d. | n.d.    | n.d. | n.d.    | 2.282 | 1.63032 | n.d.    | 0.20358 | 7.9105  | 0.19136 | 0.21944 | n.d.    | n.d.    | 0.19058 | n.d.   | 0.17654 | 13.5967 | 0.16224 | 0.04576 | 0.08736 | n.d.   | n.d.   | 0.11856 | n.d.   | 0.03354 | n.d.   | n.d.    | 0.05746 | 0.05356 | n.d.   | n.d.   | 0.03874 | 0.0299 |      |
| Metribuzin    | n.d.    | n.d.    | n.d.    | n.d. | n.d.    | n.d. | n.d.    | n.d.  | n.d.    | n.d.    | n.d.    | n.d.    | n.d.    | n.d.    | n.d.    | n.d.    | n.d.    | n.d.   | n.d.    | n.d.    | n.d.    | n.d.    | n.d.    | n.d.   | n.d.   | n.d.    | n.d.   | n.d.    | n.d.   | n.d.    | n.d.    | n.d.    | n.d.   | n.d.   | n.d.    | n.d.   |      |
| Metsulfuron   | n.d.    | n.d.    | n.d.    | n.d. | 0.05522 | n.d. | n.d.    | n.d.  | 0.05112 | 0.06096 | n.d.    | 3.20164 | n.d.    | n.d.    | n.d.    | n.d.    | n.d.    | n.d.   | n.d.    | n.d.    | n.d.    | n.d.    | n.d.    | n.d.   | n.d.   | n.d.    | n.d.   | n.d.    | n.d.   | n.d.    | n.d.    | n.d.    | n.d.   | n.d.   | n.d.    | n.d.   |      |
| Prometryn     | n.d.    | n.d.    | n.d.    | n.d. | n.d.    | n.d. | n.d.    | n.d.  | n.d.    | n.d.    | n.d.    | 0.03302 | n.d.    | n.d.    | n.d.    | n.d.    | n.d.    | n.d.   | n.d.    | n.d.    | n.d.    | n.d.    | n.d.    | n.d.   | n.d.   | n.d.    | n.d.   | n.d.    | n.d.   | 0.0104  | n.d.    | n.d.    | n.d.   | n.d.   | n.d.    | n.d.   |      |
| Propazine     | n.d.    | n.d.    | n.d.    | n.d. | n.d.    | n.d. | n.d.    | n.d.  | n.d.    | n.d.    | n.d.    | n.d.    | n.d.    | n.d.    | n.d.    | n.d.    | n.d.    | n.d.   | n.d.    | n.d.    | n.d.    | n.d.    | n.d.    | n.d.   | n.d.   | n.d.    | n.d.   | n.d.    | n.d.   | n.d.    | n.d.    | n.d.    | n.d.   | n.d.   | n.d.    | n.d.   |      |
| Propiconazole | n.d.    | n.d.    | n.d.    | n.d. | n.d.    | n.d. | 0.14904 | n.d.  | n.d.    | n.d.    | n.d.    | 2.30958 | n.d.    | 0.12896 | 0.3809  | n.d.    | 0.08866 | n.d.   | n.d.    | n.d.    | n.d.    | 0.05564 | 0.13234 | n.d.   | n.d.   | n.d.    | n.d.   | n.d.    | n.d.   | n.d.    | n.d.    | n.d.    | n.d.   | n.d.   | n.d.    | n.d.   | n.d. |
| Propoxur      | n.d.    | n.d.    | n.d.    | n.d. | n.d.    | n.d. | n.d.    | n.d.  | n.d.    | n.d.    | n.d.    | n.d.    | n.d.    | n.d.    | n.d.    | n.d.    | n.d.    | n.d.   | n.d.    | n.d.    | n.d.    | n.d.    | n.d.    | n.d.   | n.d.   | n.d.    | n.d.   | n.d.    | n.d.   | n.d.    | n.d.    | n.d.    | n.d.   | n.d.   | n.d.    | n.d.   | n.d. |
| Simazine      | n.d.    | n.d.    | n.d.    | n.d. | n.d.    | n.d. | n.d.    | n.d.  | n.d.    | n.d.    | n.d.    | 1.43676 | n.d.    | n.d.    | n.d.    | n.d.    | n.d.    | n.d.   | n.d.    | 0.08008 | n.d.    | n.d.    | n.d.    | n.d.   | n.d.   | n.d.    | n.d.   | n.d.    | n.d.   | n.d.    | n.d.    | n.d.    | n.d.   | n.d.   | n.d.    | n.d.   | n.d. |
| Tebuconazole  | n.d.    | n.d.    | n.d.    | n.d. | 0.10368 | n.d. | n.d.    | n.d.  | n.d.    | n.d.    | 0.04264 | 2.59454 | n.d.    | 0.14742 | 0.03354 | 0.00918 | 0.07878 | n.d.   | n.d.    | 0.16822 | 0.03328 | 0.03198 | n.d.    | n.d.   | n.d.   | 0.12272 | n.d.   | n.d.    | n.d.   | 1.15232 | n.d.    | n.d.    | n.d.   | n.d.   | n.d.    | n.d.   |      |
| Terbutylazine | n.d.    | n.d.    | n.d.    | n.d. | n.d.    | n.d. | n.d.    | n.d.  | n.d.    | n.d.    | n.d.    | 0.07696 | n.d.    | n.d.    | 0.03614 | n.d.    | n.d.    | n.d.   | n.d.    | 0.03952 | n.d.    | n.d.    | n.d.    | n.d.   | n.d.   | n.d.    | n.d.   | n.d.    | n.d.   | n.d.    | n.d.    | n.d.    | n.d.   | n.d.   | n.d.    | n.d.   | n.d. |
| 6:2 FTS       | n.d.    | n.d.    | n.d.    | n.d. | 0.1476  | n.d. | n.d.    | n.d.  | n.d.    | n.d.    | n.d.    | 2.8574  | n.d.    | 0.299   | n.d.    | n.d.    | n.d.    | n.d.   | n.d.    | n.d.    | n.d.    | n.d.    | n.d.    | n.d.   | n.d.   | n.d.    | n.d.   | n.d.    | n.d.   | n.d.    | 0.6188  | n.d.    | n.d.   | n.d.   | n.d.    | n.d.   |      |
| 8:2 FTS       | n.d.    | n.d.    | n.d.    | n.d. | n.d.    | n.d. | n.d.    | n.d.  | n.d.    | n.d.    | n.d.    | n.d.    | n.d.    | n.d.    | n.d.    | n.d.    | n.d.    | n.d.   | n.d.    | n.d.    | n.d.    | n.d.    | n.d.    | n.d.   | n.d.   | n.d.    | n.d.   | n.d.    | n.d.   | n.d.    | 0.1378  | n.d.    | n.d.   | n.d.   | n.d.    | n.d.   |      |
| N-EtFOSE      | 0.3624  | n.d.    | n.d.    | n.d. | n.d.    | n.d. | n.d.    | n.d.  | n.d.    | n.d.    | n.d.    | n.d.    | n.d.    | n.d.    | n.d.    | n.d.    | n.d.    | n.d.   | n.d.    | n.d.    | 0.1768  | 0.3848  | n.d.    | n.d.   | 0.0598 | 0.104   | n.d.   | n.d.    | n.d.   | n.d.    | n.d.    | n.d.    | n.d.   | n.d.   | n.d.    | n.d.   | n.d. |
| N-MeFOSE      | n.d.    | n.d.    | n.d.    | n.d. | n.d.    | n.d. | n.d.    | n.d.  | n.d.    | n.d.    | n.d.    | n.d.    | n.d.    | n.d.    | n.d.    | n.d.    | n.d.    | n.d.   | n.d.    | n.d.    | n.d.    | n.d.    | n.d.    | n.d.   | n.d.   | n.d.    | n.d.   | n.d.    | n.d.   | n.d.    | n.d.    | n.d.    | n.d.   | n.d.   | n.d.    | n.d.   | n.d. |
| PFBA          | 0.0312  | 0.0338  | 0.0702  | n.d. | 0.05976 | n.d. | 0.02784 | 0.06  | n.d.    | 0.01824 | 0.1014  | 0.4966  | n.d.    | 0.1794  | 0.039   | 0.0494  | 0.0182  | n.d.   | 0.3666  | 0.0754  | 0.0712  | 0.1248  | n.d.    | 0.1456 | 0.0884 | n.d.    | 0.0754 | n.d.    | 0.0494 | 0.0754  | 0.0234  | n.d.    | 0.6984 | 0.9386 | 0.026   |        |      |
| PFBS          | 0.02928 | 0.0208  | 0.0104  | n.d. | 0.02472 | n.d. | 0.02856 | n.d.  | 0.03928 | 0.0286  | 0.02976 | 0.02863 | 0.14    | 0.0338  | 0.0442  | 0.0312  | n.d.    | 0.0338 | 0.0338  | 0.0442  | 0.0364  | 0.0338  | n.d.    | 0.0312 | 0.0338 | n.d.    | 0.0338 | n.d.    | 0.0364 | 0.0338  | 0.0338  | n.d.    | n.d.   | 0.0312 | 0.0312  |        |      |

|             |      |      |      |      |         |      |        |        |      |         |      |        |      |        |      |      |      |      |       |      |      |      |      |       |      |      |      |      |      |        |      |      |        |       |      |
|-------------|------|------|------|------|---------|------|--------|--------|------|---------|------|--------|------|--------|------|------|------|------|-------|------|------|------|------|-------|------|------|------|------|------|--------|------|------|--------|-------|------|
| PFDA        | n.d. | n.d. | n.d. | n.d. | n.d.    | n.d. | 0.1368 | n.d.   | n.d. | n.d.    | n.d. | n.d.   | n.d. | 0.0104 | n.d. | n.d. | n.d. | n.d. | n.d.  | n.d. | n.d. | n.d. | n.d. | n.d.  | n.d. | n.d. | n.d. | n.d. | n.d. | n.d.   | n.d. | n.d. | n.d.   | 0.013 | n.d. |
| PFDoDA      | n.d. | n.d. | n.d. | n.d. | n.d.    | n.d. | n.d.   | n.d.   | n.d. | n.d.    | n.d. | n.d.   | n.d. | n.d.   | n.d. | n.d. | n.d. | n.d. | n.d.  | n.d. | n.d. | n.d. | n.d. | n.d.  | n.d. | n.d. | n.d. | n.d. | n.d. | n.d.   | n.d. | n.d. | n.d.   | n.d.  |      |
| PFDS        | n.d. | n.d. | n.d. | n.d. | n.d.    | n.d. | n.d.   | n.d.   | n.d. | n.d.    | n.d. | n.d.   | n.d. | n.d.   | n.d. | n.d. | n.d. | n.d. | n.d.  | n.d. | n.d. | n.d. | n.d. | n.d.  | n.d. | n.d. | n.d. | n.d. | n.d. | n.d.   | n.d. | n.d. | n.d.   | n.d.  |      |
| PFECHS      | n.d. | n.d. | n.d. | n.d. | n.d.    | n.d. | n.d.   | n.d.   | n.d. | n.d.    | n.d. | n.d.   | n.d. | 0.0962 | n.d. | n.d. | n.d. | n.d. | n.d.  | n.d. | n.d. | n.d. | n.d. | n.d.  | n.d. | n.d. | n.d. | n.d. | n.d. | 0.0182 | n.d. | n.d. | n.d.   | n.d.  | n.d. |
| PFHpA       | n.d. | n.d. | n.d. | n.d. | n.d.    | n.d. | n.d.   | n.d.   | n.d. | n.d.    | n.d. | 0.2704 | n.d. | 0.039  | n.d. | n.d. | n.d. | n.d. | 0.039 | n.d. | n.d. | n.d. | n.d. | n.d.  | n.d. | n.d. | n.d. | n.d. | n.d. | n.d.   | n.d. | n.d. | n.d.   | n.d.  | n.d. |
| PFHpS       | n.d. | n.d. | n.d. | n.d. | n.d.    | n.d. | n.d.   | n.d.   | n.d. | n.d.    | n.d. | n.d.   | n.d. | n.d.   | n.d. | n.d. | n.d. | n.d. | n.d.  | n.d. | n.d. | n.d. | n.d. | n.d.  | n.d. | n.d. | n.d. | n.d. | n.d. | n.d.   | n.d. | n.d. | n.d.   | n.d.  | n.d. |
| PFHxA       | n.d. | n.d. | n.d. | n.d. | 0.03816 | n.d. | n.d.   | 0.0312 | n.d. | n.d.    | n.d. | 1.1752 | n.d. | 0.078  | n.d. | n.d. | n.d. | n.d. | n.d.  | n.d. | n.d. | n.d. | n.d. | 1.391 | n.d. | n.d. | n.d. | n.d. | n.d. | 0.0494 | n.d. | n.d. | 0.2016 | n.d.  | n.d. |
| PFHxS       | n.d. | n.d. | n.d. | n.d. | n.d.    | n.d. | n.d.   | n.d.   | n.d. | n.d.    | n.d. | 1.1856 | n.d. | n.d.   | n.d. | n.d. | n.d. | n.d. | n.d.  | n.d. | n.d. | n.d. | n.d. | n.d.  | n.d. | n.d. | n.d. | n.d. | n.d. | n.d.   | n.d. | n.d. | n.d.   | n.d.  | n.d. |
| PFHxS_total | n.d. | n.d. | n.d. | n.d. | n.d.    | n.d. | n.d.   | n.d.   | n.d. | n.d.    | n.d. | 1.3052 | n.d. | 0.0494 | n.d. | n.d. | n.d. | n.d. | n.d.  | n.d. | n.d. | n.d. | n.d. | n.d.  | n.d. | n.d. | n.d. | n.d. | n.d. | n.d.   | n.d. | n.d. | n.d.   | n.d.  | n.d. |
| PFNA        | n.d. | n.d. | n.d. | n.d. | n.d.    | n.d. | n.d.   | n.d.   | n.d. | n.d.    | n.d. | n.d.   | n.d. | n.d.   | n.d. | n.d. | n.d. | n.d. | n.d.  | n.d. | n.d. | n.d. | n.d. | n.d.  | n.d. | n.d. | n.d. | n.d. | n.d. | n.d.   | n.d. | n.d. | n.d.   | n.d.  | n.d. |
| PFOA        | n.d. | n.d. | n.d. | n.d. | n.d.    | n.d. | n.d.   | n.d.   | n.d. | 0.00696 | n.d. | n.d.   | n.d. | 0.052  | n.d. | n.d. | n.d. | n.d. | n.d.  | n.d. | n.d. | n.d. | n.d. | n.d.  | n.d. | n.d. | n.d. | n.d. | n.d. | n.d.   | n.d. | n.d. | n.d.   | n.d.  | n.d. |
| PFOS        | n.d. | n.d. | n.d. | n.d. | n.d.    | n.d. | n.d.   | n.d.   | n.d. | n.d.    | n.d. | 0.0884 | n.d. | 0.0468 | n.d. | n.d. | n.d. | n.d. | n.d.  | n.d. | n.d. | n.d. | n.d. | n.d.  | n.d. | n.d. | n.d. | n.d. | n.d. | n.d.   | n.d. | n.d. | n.d.   | n.d.  | n.d. |
| PFOS_total  | n.d. | n.d. | n.d. | n.d. | n.d.    | n.d. | n.d.   | n.d.   | n.d. | n.d.    | n.d. | 0.0936 | n.d. | n.d.   | n.d. | n.d. | n.d. | n.d. | n.d.  | n.d. | n.d. | n.d. | n.d. | n.d.  | n.d. | n.d. | n.d. | n.d. | n.d. | 0.0182 | n.d. | n.d. | n.d.   | n.d.  | n.d. |
| PFPeA       | n.d. | n.d. | n.d. | n.d. | n.d.    | n.d. | n.d.   | n.d.   | n.d. | 0.00288 | n.d. | 0.4628 | n.d. | n.d.   | n.d. | n.d. | n.d. | n.d. | n.d.  | n.d. | n.d. | n.d. | n.d. | n.d.  | n.d. | n.d. | n.d. | n.d. | n.d. | n.d.   | n.d. | n.d. | n.d.   | n.d.  | n.d. |
| PFPeS       | n.d. | n.d. | n.d. | n.d. | n.d.    | n.d. | n.d.   | n.d.   | n.d. | n.d.    | n.d. | 0.4368 | n.d. | n.d.   | n.d. | n.d. | n.d. | n.d. | n.d.  | n.d. | n.d. | n.d. | n.d. | n.d.  | n.d. | n.d. | n.d. | n.d. | n.d. | n.d.   | n.d. | n.d. | n.d.   | n.d.  | n.d. |
